# Supplementary material
Source: publisher site journal article supplement (https://www.dovepress.com/article/383960)

**Supplementary Table 1** Specific interpretation of the clinical indicators collected

| Variables | **Definition** |
| --- | --- |
| **Demographic characteristics** |  |
| Age (years) | Age, ranges from 18 to 89. |
| Sex | Male & female. |
| Current use of Insulin | Currently using any form of insulin, regardless of when it was started. |
| Random blood glucose (mmol/L) | The value was collected from the random blood sugar test at the first admission. |
| Years of diabetes | Years from diagnosis of diabetes to present. |
| DFU History | Having any record of confirmed DFU at our hospital or other medical institutions. |
| Drinking History | The criteria for being classified as having a drinking history include a long history of drinking lasting for more than 5 years and daily alcohol consumption ≥ 80 g. |
| Smoking History | The definition refers to the standard recommended by the WHO in 1984, that is, smoking more than one cigarette a day for a continuous period of one month; otherwise, it is judged to be nonsmoking. |
| **Wound characteristics** |  |
| Wound duration | This period ranged from the first discovery to the first visit to the hospital. |
| Wound area(cm2) | The wound area was measured by a plastic surgeon  with a ruler at the first admission, and the irregular part  of the wound was measured by ImageJ after being  photographed. |
| Wound classification | The University of Texas Classification System (UT) classification was used for wound grading. |
| Ulcer location | The location of the ulcer was judged by an endocrinologist and a plastic surgeon at the first admission. |
| **Comorbidity** |  |
| Hyperlipidemia | Hyperlipidemia is known as lipid metabolism disorder and refers to total cholesterol (TC), triglyceride (TG), high-density lipoprotein cholesterol (HDL-C), and low-density lipoprotein cholesterol (LDL-C) exceeding the standard value. |
| Hypertension | The criteria for determining hypertension are as follows: blood pressure ≥ 140/90 mmHg or use of antihypertensive drugs with normal blood pressure. |
| Cardiovascular disease | In the current study, cardiovascular diseases mainly included coronary artery disease and heart failure. |
| Retinopathy | Including non-proliferative diabetic retinopathy and proliferative diabetic retinopathy. |
| Peripheral arterial disease | If any lower extremity artery occlusions are found by Doppler ultrasound, it is diagnosed as peripheral artery disease. |
| Neurologic disease | Clinical symptoms, such as finger/toe symmetrical sensory disturbance or abnormal nerve conduction velocity, are noted on electrophysiological nerve examination. Two of the following diagnostic criteria of DPN must be met: (1) neuropathic pain, anesthesia, or other sensory abnormalities; (2) abnormal acupuncture sensation of the lower extremities or changes in the 10 g Sims-Weinstein monofilament test; or (3) decreased ankle reflex. |
| Albumin(g/L) | The value was collected from medical records at the first admission |
| C-reactive protein(mg/L) | The value was collected from medical records at the first admission |
| Creatinine(μmol/L) | The value was collected from medical records at the first admission |

**Supplementary Table 2** Evaluation metrics of Models

| CM | Labeled | Predicted as negative | Predicted as positive |
| --- | --- | --- | --- |
| Negative | TN | FP |
| Positive | FN | TP |
| Recall |  | | |
| Accuracy |  | | |
| Precision |  | | |
| F1-score |  | | |

**Abbreviations:** CM, Confusion matrix; TP, True positive; FP, False positive; FN, False negative; TN, True negative.

**Supplementary Table 3** Characteristics of the six algorithms and the compatibility of those algorithms with our data.

| Algorithms | Characteristics | Compatibility with our data |
| --- | --- | --- |
| **Single classification algorithms** |  |  |
| GLM | 1. Applied to both classification and regression tasks. 2. As a traditional classical statistical method， it is fast and simple to implement, and very efficient (low computational effort and low storage footprint). 3. High interpretability: the model parameters represent the effect of each feature on the output. | 1. Our dataset offered a binary classification task. 2. GLM is available as a traditional model and can be a reference for the performance of its models |
| KNN | 1. Applied to both classification and regression tasks. 2. The KNN algorithm simply saves the samples in the training phase, with zero training time overhead, and then processes them when the test samples are received, requiring the calculation of the similarity between the test and training samples one by one (lazy learning). 3. Different units of feature metrics may cause bias in the proximity metric. | 1. Our dataset offered a binary classification task. 2. The size of our data set is small, therefore KNN is as fast as other algorithms. 3. The features and labels in our dataset are pre-processed. Variability is similar. Proximity metric accuracy is guaranteed. |
| NB | 1. Applied to the classification task. 2. The NB algorithm is based on the assumption that features are independent of each other to achieve optimal performance. 3. The NB algorithm performs well on small data sizes and is suitable for incremental training | 1. Our dataset offered a binary classification task. 2. Features were screened by univariate analysis and clinical experience. The characteristics were independent of each other according to the multivariate analysis performed in the GLM algorithm. 3. Our dataset is small. Also, the model trained in this study can be used as a reference for incremental training by subsequent researchers. |
| SVM | 1. Applied to the classification task. 2. The classical SVM algorithm only gives algorithms for binary classification, if a multi-classification problem is to be solved, it has to be solved by a combination of several binary SVMs. SVM is suitable for binary data with small sample sizes and/or involving multiple variables. 3. The final decision function of the SVM is determined by only a small number of support vectors, which not only avoids "dimensional catastrophe" but also maintains good "robustness", i.e. the final result should not be too affected by data perturbations, noise and outliers present in the model. | 1. Our dataset is small in size and offered a binary classification task 2. "Robustness" of SVM to address the problem of large individual patient variation |
| **Ensemble classification algorithms** |  |  |
| AdaBoost | 1. Applied to both classification and regression tasks. 2. In the framework of Adaboost, it is possible to build weak learners using various regression classification models, without filtering the features, which is very flexible. 3. High accuracy as an integrated algorithm. | 1. Our dataset offered a binary classification task. 2. As a classical ensemble classification algorithm, it is expected to perform well and necessary to be taken into account. |
| RF | 1. Applied to both classification and regression tasks. 2. RF uses autonomous sampling to draw multiple samples from the original data. The samples drawn are first trained with a weak classifier - a decision tree - and then these decision trees are combined together to produce a final classification or prediction result by voting. 3. RF can handle high dimensional data, missing data and unbalanced data | 1. Our dataset offered a binary classification task 2. This dataset has been pre-processed to remove missing data. There are no imbalance issues with the labels. 3. As a classical ensemble classification algorithm, it is expected to perform well and necessary to be taken into account. |

**Abbreviations:** AdaBoost, adaptive boosting; GLM, generalized linear model; KNN, k-nearest neighbor; NB, naïve Bayes; RF, random forest; SVM: support vector machine.

**Supplementary Figure 1**. An example of the use of the web-based calculator.


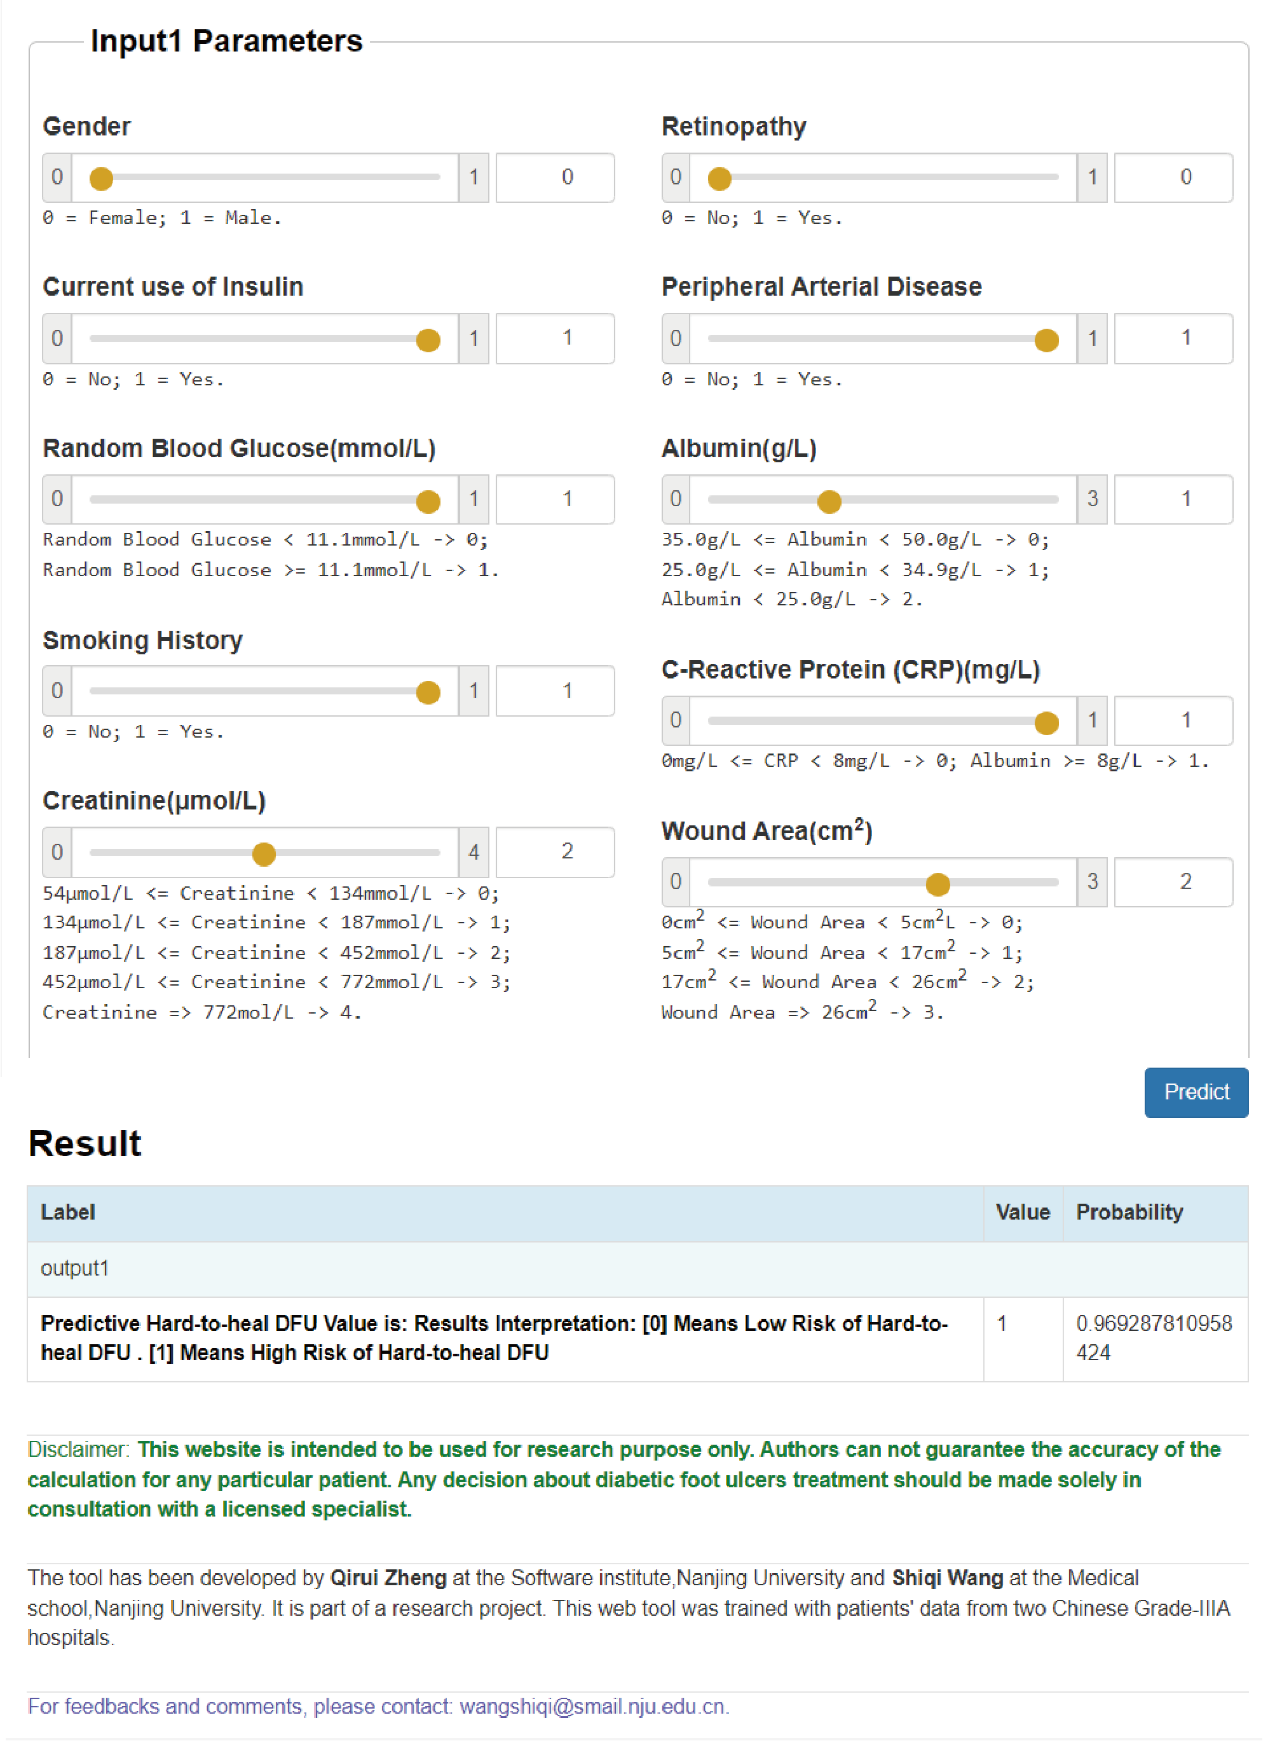

Supplement: Supplementary file 1 [file get_supplementary_file.php]
